# Supplementary material for: Effect of changes in moderate or vigorous physical activity on changes in health-related quality of life of elderly British women over seven years
Source: Springer Nature journal article supplement (doi:10.1007/s11136-012-0332-2), 2012-12-14
Supplement: MOESM1 [file 278388]

**SUPPLEMETARY MATERIALS**

**Supplementary Methods 1: Imputation method for missing data in moderate or vigorous physical activity (MVPA) variables**

Among the 4,286 participants at baseline and 2,685 participants in 2007, 2,533 and 1,034 provided sufficient data on MVPA level respectively. Missing hours of walking, cycling, and physical exercise were replaced with zero if the participant responded to at least one of the following physical activity questionnaire questions:

- “Do you make regular journeys every day or most days either walking or cycling?”
- “Which of the following best describes your usual walking pace? : slow, steady average, fairly brisk, or fast (at least 4miles/hr)”
- “In a typical week during the past year, how many hours did you spend each week in the following activities?”
- walking to work, shopping and leisure
- cycling, including to work and leisure
- light gardening eg. pruning, watering
- heavy gardening eg. digging, mowing
- physical exercise eg. fitness, aerobics, swimming, jogging, tennis
- “Do it yourself” (DIY) eg. on house, car
- light housework activities eg. cooking, washing up, dusting
- heavy housework activities eg. hovering floors, window cleaning

This imputation method was not used for 32 and 13 missing MVPA records at baseline and in 2007 respectively as the walking speed was unknown. An extreme value of MVPA in 2007, 160 hours per week, was deleted as it seemed impossible for the participant to have had reasonable time for sleeping. After imputation, the number of participants with MVPA data was 4,071 at baseline and 2,293 in 2007.

**Supplementary Methods 2: Categories of moderate or vigorous physical activity (MVPA) change**

The three MVPA categories (no MVPA: 0 hours per week; low MPVA: > 0 and ≤ 2 hours per week; moderate-high MVPA: > 2 hours per week) from baseline and 2007 data were cross-tabulated to generate the nine possible patterns of change, including stable MVPA level groups (no MPVA to no MVPA, low to low, and moderate-high to moderate-high), decreased MVPA level groups (low to no MVPA, moderate-high to no MVPA, and moderate-high to low), and increased MVPA level groups (no MVPA to low, no MVPA to moderate-high, and low to moderate-high).

For investigating the presence of a dose-response association between changes in MVPA and changes in EQ-5D score, the categories of MVPA changes were ordered in an ascending order within each baseline MVPA category as follows:

1. for **‘no MVPA’ at baseline**: 0=(no MVPA to no MVPA), 1=(no MVPA to low MVPA), 2= (no MVPA to moderate-high MVPA);
2. for **‘low MVPA’ at baseline**: 0=(low MVPA to no MVPA), 1=(low MVPA to low MVPA), 2=(low MVPA to moderate-high MVPA);
3. for **‘moderate-high MVPA’ at baseline**: 0=(moderate-high MVPA to no MVPA), 1=(moderate-high MVPA to low MVPA), 2=(moderate-high MVPA to moderate-high MVPA)

**Supplementary Fig. 1** Inclusion criteria for analysis

Participants at baseline (1999/2000)

N=4,286

505 died before 7-year follow-up

Inclusion criteria for this study

1. Sufficient data on MVPA both at baseline and in 2007
2. Reasonable MVPA level: enough time for sleeping
3. Available EQ-5D score both at baseline and in 2007

778 women without either baseline/2007 MVPA data or baseline/2007 EQ-5D score excluded

Eligible participants

for analysis

N=1,926

Participants alive at 7-year follow-up

N=3,781

Participants returned filled

2007 questionnaire

N=2,704

1,077 women excluded

- Declined (N=129)
- No response (N=914)
- Lost contact (N=34)

**Supplementary Table 1** Comparison of baseline characteristics between those included* and excluded (N=4,286)

[MVPA§ levels – no MVPA: 0hrs/wk, Low MVPA: > 0 and ≤ 2hrs/wk, Moderate-High MVPA: > 2hrs/wk]

| **Variables** | **Included**  **(N=1,926)** | | **Excluded,**  **not deceased (N=1,855)** | | **Deceased**  **(N=505)** | | **p-value †** |
| --- | --- | --- | --- | --- | --- | --- | --- |
| **n** | **(%)** | **n** | **(%)** | **n** | **(%)** |
| no MVPA | 1,058 | (54.93%) | 1,169 | (63.02%) | 366 | (72.48%) |  |
| Low MVPA | 325 | (16.87%) | 208 | (11.21%) | 38 | ( 7.52%) |  |
| Moderate-High MVPA | 543 | (28.19%) | 305 | (16.44%) | 59 | (11.68%) |  |
| missing | 0 | ( 0 %) | 173 | ( 9.33%) | 42 | ( 8.32%) | < 0.001 |
| **Age at baseline** |  |  |  |  |  |  |  |
| 59 - 64 years | 644 | (33.44%) | 480 | (25.88%) | 56 | (11.09%) |  |
| 65 - 69 years | 536 | (27.83%) | 493 | (26.58%) | 104 | (20.59%) |  |
| 70 - 74 years | 479 | (24.87%) | 474 | (25.55%) | 158 | (31.29%) |  |
| 75+ years | 267 | (13.86%) | 407 | (21.94%) | 187 | (37.03%) |  |
| missing | 0 | ( 0 %) | 1 | ( 0.05%) | 0 | ( 0 %) | < 0.001 |
| **Smoking status** |  |  |  |  |  |  |  |
| non-smoker | 1,171 | (60.80%) | 995 | (53.64%) | 205 | (40.59%) |  |
| ex-smoker | 596 | (30.94%) | 615 | (33.15%) | 190 | (37.62%) |  |
| current smoker | 157 | ( 8.15%) | 232 | (12.51%) | 106 | (20.99%) |  |
| missing | 2 | ( 0.10%) | 13 | ( 0.70%) | 4 | ( 0.79%) | < 0.001 |
| **Alcohol consumption** |  |  |  |  |  |  |  |
| most days | 392 | (20.35%) | 259 | (13.96%) | 63 | (12.48%) |  |
| weekends only | 364 | (18.90%) | 302 | (16.28%) | 70 | (13.86%) |  |
| once or twice a month | 226 | (11.73%) | 154 | ( 8.30%) | 32 | ( 6.34%) |  |
| special occasions | 644 | (33.44%) | 590 | (31.81%) | 165 | (32.67%) |  |
| never | 246 | (12.77%) | 304 | (16.39%) | 97 | (19.21%) |  |
| missing | 54 | ( 2.80%) | 246 | (13.26%) | 78 | (15.45%) | < 0.001 |
| **Fruit/veg intake** |  |  |  |  |  |  |  |
| less than twice/day | 835 | (43.35%) | 758 | (40.86%) | 221 | (43.76%) |  |
| 2-3 times/day | 760 | (39.46%) | 505 | (27.22%) | 133 | (26.34%) |  |
| 4-5 times/day | 182 | ( 9.45%) | 154 | ( 8.30%) | 29 | ( 5.74%) |  |
| missing | 149 | ( 7.74%) | 438 | (23.61%) | 122 | (24.16%) | < 0.001 |
| **Lifecourse SEP score** |  |  |  |  |  |  |  |
| most advantaged (1 to 2) | 503 | (26.12%) | 248 | (13.37%) | 67 | (13.27%) |  |
| higher middle (3 to 4) | 564 | (29.28%) | 342 | (18.44%) | 83 | (16.44%) |  |
| lower middle (5 to 6) | 388 | (20.15%) | 393 | (21.19%) | 105 | (20.79%) |  |
| most deprived (7 to 9) | 186 | ( 9.66%) | 233 | (12.56%) | 74 | (14.65%) |  |
| missing | 285 | (14.80%) | 639 | (34.45%) | 176 | (34.85%) | < 0.001 |
| **Comorbidity score at baseline** | |  |  |  |  |  |  |
| no comorbidity (0) | 682 | (35.41%) | 652 | (35.15%) | 148 | (29.31%) |  |
| > 0 and < 1 | 607 | (31.52%) | 434 | (23.40%) | 89 | (17.62%) |  |
| ≥ 1 and < 2 | 386 | (20.04%) | 415 | (22.37%) | 119 | (23.56%) |  |
| 2 to max (10) | 251 | (13.03%) | 354 | (19.08%) | 149 | (29.50%) | < 0.001 |

* Only the women with data on both MVPA and HR-QoL at baseline (2000) and in 2007 were included.

§ MVPA: moderate or vigorous physical activity

† p-value from chi-square test

**Supplementary Table 2** Median (interquartile range) comorbidity score and Euro Quality of Life 5 Dimension (EQ-5D) score across categories of MVPA§ level (N=1,926)

[MVPA levels – no MVPA: 0hrs/wk, Low MVPA: > 0 and ≤ 2hrs/wk, Moderate-High MVPA: > 2hrs/wk]

| **Variables** | **No MVPA (N=1,058)** | **Low MVPA (N=325)** | **Moderate-High MVPA (N=543)** | **p-value †** |
| --- | --- | --- | --- | --- |
| Comorbidity score at baseline | 9.09 (0, 18.18) | 9.09 (0, 12.5) | 9.09 (0, 10) | < 0.001 |
| EQ-5D score at baseline | 0.80 (0.69, 1) | 0.80 (0.76, 1) | 1 (0.80, 1) | < 0.001 |
| EQ-5D score in 2007 | 0.76 (0.62, 0.88) | 0.80 (0.69, 1) | 0.85 (0.76, 1) | < 0.001 |

§ MVPA: moderate or vigorous physical activity

† p-value from Cuzick’s test for trend

**Supplementary Table 3** Odds ratios (95% confidence interval) of maintaining or improving* health-related quality of life over 7 years, sensitivity analysis

[MVPA§ levels – no MVPA: 0hrs/wk, Low MVPA: > 0 and ≤ 2hrs/wk, Moderate-High MVPA: > 2hrs/wk]

| **MVPA level groups  at baseline (2000)** | **MVPA level groups in 2007** | | |
| --- | --- | --- | --- |
| **No MVPA** | **Low MVPA** | **Moderate-High MVPA** |
| **No MVPA** | (reference group) | † Adj. Model A: 1.20 (0.67 - 2.13)  B: 1.18 (0.66 - 2.10)  C: 1.20 (0.67 - 2.14) | Adj. Model A: 2.21 (1.22 - 4.01)  B: 2.23 (1.23 - 4.05)  C: 2.22 (1.22 - 4.04) |
| **Low MVPA** | Adj. Model A: 1.11 (0.77 - 1.58)  B: 1.08 (0.76 - 1.55)  C: 1.11 (0.78 - 1.59) | Adj. Model A: 1.32 (0.78 - 2.25)  B: 1.30 (0.76 - 2.21)  C: 1.33 (0.78 - 2.26) | Adj. Model A: 1.80 (0.85 - 3.82)  B: 1.80 (0.85 - 3.82)  C: 1.82 (0.86 - 3.85) |
| **Moderate-High**  **MVPA** | Adj. Model A: 1.02 (0.73 - 1.43)  B: 1.00 (0.71 - 1.40)  C: 1.02 (0.73 - 1.44) | Adj. Model A: 1.71 (0.95 - 3.06)  B: 1.70 (0.95 - 3.06)  C: 1.72 (0.96 - 3.08) | Adj. Model A: 1.94 (1.34 - 2.82)  B: 1.92 (1.32 - 2.79)  C: 1.94 (1.34 - 2.82) |

* [2007 Euro Quality of Life 5 Dimension (EQ-5D) score] – [2000 EQ-5D score] ≥ 0

§ MVPA: moderate or vigorous physical activity

† Adjusted for age, smoking status, frequency of alcohol consumption, frequency of fruit/vegetable intake, lifecourse SEP score, baseline EQ-5D score, and

- A: baseline comorbidity score
- B: baseline comorbidity score from the worst case scenario in which all missing data on comorbidity were systematically replaced with disease cases
- C: baseline comorbidity score from the best case scenario in which all missing data on comorbidity were systematically replaced with non-cases
